# Supplementary material
Source: HighWire-hosted journal article supplement (doi:10.1101/rna.073775.119)
Supplement: Supplemental_Data_Legends_final.docx [file Supplemental_Data_Legends_final.docx]

**Supplemental Figure 1. Chemical structure of 5-nitroindole.**

**Supplemental Figure 2. Native agarose gel analysis of a luciferase-derived siRNA sequence.**

RISC assembly of an siRNA sequence derived from firefly luciferase (Luc) was analyzed on the native agarose gel. Stronger signals for mature RISC-like bands (asterisk) were observed with 6-mCEPh-purine compared to A. Please note that the identities of the bands for the *let-7* siRNA sequence (Figures 2–6) have been previously determined in a rigorous manner (Yoda et al. 2010), but those for the Luc sequence remain to be validated.

**Supplemental Figure** **3.** **The effect of MNase treatment on the native agarose gel assay.**

Digestion of endogenous mRNAs by the MNase treatment allowed the detection of mature Ago2-RISC as a discrete signal on the native agarose gel in the absence of targets.

**Supplemental Figure** **4. Two models to explain no apparent change in pre-RISC formation by 6-mCEPh-purine.**

Model 1: The “double-stranded state” of siRNA duplexes acts as an additional anchor point for Ago2 (cyan flag with oval), masking the effect of the 5′ nucleobase anchoring (green flag with circle) at the step of pre-Ago2-RISC formation. Model 2: Some structural constraints hinder the 5′ nucleobase to be anchored in the 5′ nucleotide-binding pocket at the step of pre-Ago2-RISC formation.

**Supplemental Table 1. Summary of statistical analyses.**

*p*-values indicated in Figures are shown in red. See Materials and Methods for the details of the analyses.
