# Supplementary material
Source: HighWire-hosted journal article supplement (doi:10.1101/rna.073775.119)
Supplement: Supplemental_Table_1.xlsx [file Supplemental_Table_1.xlsx]

## Sheet: Supplemental table 1
Supplemental table 1
Figure 1D and E:
Percentage target cleaved (3 independent experiments) :
ANOVA on the effect of time and nucleotide identity (no interaction) (untransformed data)	ANOVA on the effect of time and nucleotide identity, and their interaction (untransformed data)		Pairwise comparisons (untransformed data)			Verification of ANOVA applicability
p-value for nucleotide identity	p-value for nucleotide identity	p-value for interaction between nucleotide identity and time	Comparison	FDR-adjusted p-value for pairwise comparison (effect of nucleotide identity)	FDR-adjusted p-value for pairwise comparison (interaction between nucleotide identity and time)	Test	p-value
8.48e-12	1.33e-11	0.439	A vs U	0.0282	(not applicable)	Levene test on untransformed data	0.985
			A vs 6-mCEPh-purine	0.01452	(not applicable)	Shapiro-Wilk test on residuals from untransformed data	0.344
			A vs G	6e-08	(not applicable)
			U vs 6-mCEPh-purine	0.0001497	(not applicable)
			U vs G	7.46e-08	(not applicable)
			6-mCEPh-purine vs G	5.49e-08	(not applicable)
(data and scripts for the statistical analyses in Figure 1 : https://github.com/HKeyHKey/Brechin_et_al_2020/tree/master/Figure_1)
Figure 2C, D and E:
Pre-RISC abundance (3 independent experiments):
ANOVA on the effect of time and nucleotide identity (no interaction) (log-transformed data)	ANOVA on the effect of time and nucleotide identity, and their interaction (log-transformed data)		Pairwise comparisons (log-transformed data)			Verification of ANOVA applicability
p-value for nucleotide identity	p-value for nucleotide identity	p-value for interaction between nucleotide identity and time	Comparison	FDR-adjusted p-value for pairwise comparison (effect of nucleotide identity)	FDR-adjusted p-value for pairwise comparison (interaction between nucleotide identity and time)	Test	p-value
0.0043	0.00274 (imprecisely determined: residuals are not really normally distributed)	0.04019 (imprecisely determined: residuals are not really normally distributed)	A vs U	0.1803	0.8304	Levene test on untransformed data	0.965
			A vs 6-mCEPh-purine	0.4596	0.998	Shapiro-Wilk test on residuals from untransformed data	0.00643
			A vs G	0.957	0.573	Levene test on log-transformed data	0.999
			U vs 6-mCEPh-purine	0.232	0.8304	Shapiro-Wilk test on residuals from log-transformed data	0.0383
			U vs G	0.1218	0.618
			6-mCEPh-purine vs G	0.354	0.3048
Mature RISC abundance (3 independent experiments):
ANOVA on the effect of time and nucleotide identity (no interaction) (untransformed data)	ANOVA on the effect of time and nucleotide identity, and their interaction (untransformed data)		Pairwise comparisons (untransformed data)			Verification of ANOVA applicability
p-value for nucleotide identity	p-value for nucleotide identity	p-value for interaction between nucleotide identity and time	Comparison	FDR-adjusted p-value for pairwise comparison (effect of nucleotide identity)	FDR-adjusted p-value for pairwise comparison (interaction between nucleotide identity and time)	Test	p-value
9.91e-14	< 2E-16	3.86e-08	A vs U	0.146	0.6372	Levene test on untransformed data	0.923
			A vs 6-mCEPh-purine	0.000357	0.765	Shapiro-Wilk test on residuals from untransformed data	0.948
			A vs G	1.978e-09	4.53e-06
			U vs 6-mCEPh-purine	0.01836	0.51
			U vs G	5.49e-11	2.18e-05
			6-mCEPh-purine vs G	6e-14	1.278e-06
(data and scripts for the statistical analyses in Figure 2 : https://github.com/HKeyHKey/Brechin_et_al_2020/tree/master/Figure_2)
Figure 3C, D and E:
Pre-RISC abundance (3 independent experiments):
ANOVA on the effect of time and nucleotide identity (no interaction) (log-transformed data)	ANOVA on the effect of time and nucleotide identity, and their interaction (log-transformed data)		Pairwise comparisons (log-transformed data)			Verification of ANOVA applicability
p-value for nucleotide identity	p-value for nucleotide identity	p-value for interaction between nucleotide identity and time	Comparison	FDR-adjusted p-value for pairwise comparison (effect of nucleotide identity)	FDR-adjusted p-value for pairwise comparison (interaction between nucleotide identity and time)	Test	p-value
0.0964	(not applicable)	(not applicable)	(not applicable)	(not applicable)	(not applicable)	Levene test on untransformed data	0.645
						Shapiro-Wilk test on residuals from untransformed data	0.0329
						Levene test on log-transformed data	0.992
						Shapiro-Wilk test on residuals from log-transformed data	0.276
Mature RISC abundance (3 independent experiments):
ANOVA on the effect of time and nucleotide identity (no interaction) (untransformed data)	ANOVA on the effect of time and nucleotide identity, and their interaction (untransformed data)		Pairwise comparisons (untransformed data)			Verification of ANOVA applicability
p-value for nucleotide identity	p-value for nucleotide identity	p-value for interaction between nucleotide identity and time	Comparison	FDR-adjusted p-value for pairwise comparison (effect of nucleotide identity)	FDR-adjusted p-value for pairwise comparison (interaction between nucleotide identity and time)	Test	p-value
4.51e-15	< 2E-16	3.13e-07	A vs U	0.001572	0.00264	Levene test on untransformed data	0.8
			A vs 6-mCEPh-purine	4.5e-13	0.0129	Shapiro-Wilk test on residuals from untransformed data	0.341
			A vs G	0.187	0.0881
			U vs 6-mCEPh-purine	6.9e-13	0.0881
			U vs G	3.18e-05	2.574e-05
			6-mCEPh-purine vs G	6.72e-14	4.74e-05
(data and scripts for the statistical analyses in Figure 3 : https://github.com/HKeyHKey/Brechin_et_al_2020/tree/master/Figure_3)
Figure 4C, D and E:
Pre-RISC abundance (3 independent experiments):
ANOVA on the effect of time and nucleotide identity (no interaction) (untransformed data)	ANOVA on the effect of time and nucleotide identity, and their interaction (untransformed data)		Pairwise comparisons (untransformed data)			Verification of ANOVA applicability
p-value for nucleotide identity	p-value for nucleotide identity	p-value for interaction between nucleotide identity and time	Comparison	FDR-adjusted p-value for pairwise comparison (effect of nucleotide identity)	FDR-adjusted p-value for pairwise comparison (interaction between nucleotide identity and time)	Test	p-value
2.25e-05	3.73e-06	0.00206	A vs U	1.758e-05	0.0358	Levene test on untransformed data	0.876
			A vs 6-mCEPh-purine	0.622	0.001362	Shapiro-Wilk test on residuals from untransformed data	0.594
			A vs G	0.423	0.687
			U vs 6-mCEPh-purine	1.758e-05	0.15
			U vs G	0.00218	0.15
			6-mCEPh-purine vs G	0.622	0.02202
Mature RISC abundance (3 independent experiments):
ANOVA on the effect of time and nucleotide identity (no interaction) (untransformed data)	ANOVA on the effect of time and nucleotide identity, and their interaction (untransformed data)		Pairwise comparisons (untransformed data)			Verification of ANOVA applicability
p-value for nucleotide identity	p-value for nucleotide identity	p-value for interaction between nucleotide identity and time	Comparison	FDR-adjusted p-value for pairwise comparison (effect of nucleotide identity)	FDR-adjusted p-value for pairwise comparison (interaction between nucleotide identity and time)	Test	p-value
<2e-16	< 2e-16	0.00241	A vs U	0.00884	0.815	Levene test on untransformed data	0.918
			A vs 6-mCEPh-purine	1.868e-07	0.815	Shapiro-Wilk test on residuals from untransformed data	0.0621
			A vs G	8.235e-07	0.00676
			U vs 6-mCEPh-purine	0.0001368	0.815
			U vs G	3.96e-10	0.00513
			6-mCEPh-purine vs G	2.388e-13	0.00513
(data and scripts for the statistical analyses in Figure 4 : https://github.com/HKeyHKey/Brechin_et_al_2020/tree/master/Figure_4)
Figure 5, C and D:
Pre-RISC abundance (3 independent experiments):
ANOVA on the effect of time and nucleotide identity (no interaction) (log-transformed data)	ANOVA on the effect of time and nucleotide identity, and their interaction (log-transformed data)		Pairwise comparisons (log-transformed data)			Verification of ANOVA applicability
p-value for nucleotide identity	p-value for nucleotide identity	p-value for interaction between nucleotide identity and time	Comparison	FDR-adjusted p-value for pairwise comparison (effect of nucleotide identity)	FDR-adjusted p-value for pairwise comparison (interaction between nucleotide identity and time)	Test	p-value
0.0768	(not applicable)	(not applicable)	A vs U	(not applicable)	(not applicable)	Levene test on untransformed data	0.992
			A vs 6-mCEPh-purine	(not applicable)	(not applicable)	Shapiro-Wilk test on residuals from untransformed data	0.0492
			A vs G	(not applicable)	(not applicable)	Levene test on log-transformed data	0.997
			U vs 6-mCEPh-purine	(not applicable)	(not applicable)	Shapiro-Wilk test on residuals from log-transformed data	0.175
			U vs G	(not applicable)	(not applicable)
			6-mCEPh-purine vs G	(not applicable)	(not applicable)
(data and scripts for the statistical analyses in Figure 5 : https://github.com/HKeyHKey/Brechin_et_al_2020/tree/master/Figure_5)
Figure 6C, D and E:
Pre-RISC abundance (3 independent experiments):
ANOVA on the effect of time and nucleotide identity (no interaction) (untransformed data)	ANOVA on the effect of time and nucleotide identity, and their interaction (untransformed data)		Pairwise comparisons (untransformed data)			Verification of ANOVA applicability
p-value for nucleotide identity	p-value for nucleotide identity	p-value for interaction between nucleotide identity and time	Comparison	FDR-adjusted p-value for pairwise comparison (effect of nucleotide identity)	FDR-adjusted p-value for pairwise comparison (interaction between nucleotide identity and time)	Test	p-value
0.7648	(not applicable)	(not applicable)	A vs U	(not applicable)	(not applicable)	Levene test on untransformed data	0.845
			A vs 6-mCEPh-purine	(not applicable)	(not applicable)	Shapiro-Wilk test on residuals from untransformed data	0.128
			A vs G	(not applicable)	(not applicable)
			U vs 6-mCEPh-purine	(not applicable)	(not applicable)
			U vs G	(not applicable)	(not applicable)
			6-mCEPh-purine vs G	(not applicable)	(not applicable)
Mature RISC abundance (3 independent experiments):
ANOVA on the effect of time and nucleotide identity (no interaction) (untransformed data)	ANOVA on the effect of time and nucleotide identity, and their interaction (untransformed data)		Pairwise comparisons (untransformed data)			Verification of ANOVA applicability
p-value for nucleotide identity	p-value for nucleotide identity	p-value for interaction between nucleotide identity and time	Comparison	FDR-adjusted p-value for pairwise comparison (effect of nucleotide identity)	FDR-adjusted p-value for pairwise comparison (interaction between nucleotide identity and time)	Test	p-value
1.07e-12	1.28e-13	0.00923	A vs U	0.979	0.1935	Levene test on untransformed data	0.983
			A vs 6-mCEPh-purine	9.78e-05	0.589	Shapiro-Wilk test on residuals from untransformed data	0.712
			A vs G	8.7e-06	0.0294
			U vs 6-mCEPh-purine	4.095e-05	0.0998
			U vs G	1.767e-06	0.2832
			6-mCEPh-purine vs G	7.38e-11	0.02112
(data and scripts for the statistical analyses in Figure 6 : https://github.com/HKeyHKey/Brechin_et_al_2020/tree/master/Figure_6)
Figure 7C and D:
Percentage passenger cleaved (3 independent experiments) :
ANOVA on the effect of time and nucleotide identity (no interaction) (untransformed data)	ANOVA on the effect of time and nucleotide identity, and their interaction (untransformed data)		Pairwise comparisons (untransformed data)			Verification of ANOVA applicability
p-value for nucleotide identity	p-value for nucleotide identity	p-value for interaction between nucleotide identity and time	Comparison	FDR-adjusted p-value for pairwise comparison (effect of nucleotide identity)	FDR-adjusted p-value for pairwise comparison (interaction between nucleotide identity and time)	Test	p-value
0.352	(not applicable)	(not applicable)	A vs U	(not applicable)	(not applicable)	Levene test on untransformed data	0.999
			A vs 6-mCEPh-purine	(not applicable)	(not applicable)	Shapiro-Wilk test on residuals from untransformed data	0.585
			A vs G	(not applicable)	(not applicable)
			U vs 6-mCEPh-purine	(not applicable)	(not applicable)
			U vs G	(not applicable)	(not applicable)
			6-mCEPh-purine vs G	(not applicable)	(not applicable)
(data and scripts for the statistical analyses in Figure 7 : https://github.com/HKeyHKey/Brechin_et_al_2020/tree/master/Figure_7)
